# Supplementary material for: Intravital Imaging Reveals Divergent Cytokine and Cellular Immune Responses to Candida albicans and Candida parapsilosis
Source: PubMed Central journal article supplement (PMC6520444; doi:10.1128/mbio.00266-19), 2019-05-14
Supplement: mBio.00266-19-st001.pdf [file mBio.00266-19-st001.pdf]

**Table S1.** *Candida* strains used in this study.

| <b>Strain</b>                                                                               | <b>Source/Reference</b>                                                                                                                               |
|---------------------------------------------------------------------------------------------|-------------------------------------------------------------------------------------------------------------------------------------------------------|
| <i>C. albicans</i> SC5314 Caf2.1-dTom-NATr                                                  | R. L. Gratacap, J. F. Rawls, and R. T. Wheeler, <i>Dis. Model. Mech.</i> 6: 1260–70, 2013, doi: 10.1242/dmm.012039                                    |
| <i>C. albicans</i> WT-GFP (SC5314 (Peno1-yEGFP <sub>3</sub> -NAT))                          | R. T. Wheeler, D. Kombe, S. D. Agarwala, and G. R. Fink, <i>PLoS Pathog.</i> 4: 1–12, 2008, doi: 10.1371/journal.ppat.1000227                         |
| <i>C. albicans</i> SC5314 Caf2:FR                                                           | A. C. Bergeron, B. G. Seman, J. H. Hammond, L. S. Archambault, D. A. Hogan, and R. T. Wheeler, <i>Infect. Immun.</i> , 2017, doi:10.1128/IAI.00475-17 |
| <i>C. parapsilosis</i> clinical isolate 4175 (A010)<br>CpURA3/CpURA3 ENO1/ENO1::GFP-NAT1    | S. Gonja, B. Larson, and C. A. Gale, <i>Yeast</i> , 33(2): 63–9, 2016, doi: 10.1002/yea.3141                                                          |
| <i>C. parapsilosis</i> clinical isolate 4175 (A010)<br>CpURA3/CpURA3 ENO1-mCherry-NAT1/ENO1 |                                                                                                                                                       |
